# Supplementary material
Source: MDPI journal article supplement (https://www.mdpi.com/2073-4344/12/11/1437)
Supplement: s1 [file s1]

# Nickel and Cobalt Ilmenites-Based Catalysts for Upgrading Pyrolytic Oil during Pyrolysis of Waste Tires

Daniela Correa-Muriel <sup>1</sup>, Hoover Valencia-Sánchez <sup>2</sup>, Héctor Cortes-Hernández <sup>2</sup>,  
Daniela González-Vera <sup>3</sup>, Javiera Herrera <sup>3</sup>, Cristian H. Campos <sup>3,\*</sup>, Mónica L. Casella <sup>1</sup>,  
Luis E. Arteaga-Perez <sup>4</sup> and Paula Osorio-Vargas <sup>1,\*</sup>

<sup>1</sup> Centro de Investigación y Desarrollo en Ciencias Aplicadas “Dr. Jorge J. Ronco” (CINDECA), Departamento de Química, Facultad de Ciencias Exactas, UNLP-CCT La Plata, CICPBA, CONICET, 47 No. 257, La Plata 1900, Buenos Aires, Argentina

<sup>2</sup> Grupo de Investigación en Fotocatálisis y Estado Sólido, Escuela de Química, Universidad Tecnológica de Pereira, Pereira, Risaralda 660003, Colombia

<sup>3</sup> Departamento de Físico-Química, Facultad de Ciencias Químicas, Universidad de Concepción, Concepción 4030000, Chile

<sup>4</sup> Laboratory of Thermal and Catalytic Processes (LPTC), Wood Engineering Department, Faculty of Engineering, Universidad del Bio-Bio, Concepción 4030000, Chile

\* Correspondence: ccampos@udec.cl (C.H.C.); paulaosorio@quimica.unlp.edu.ar (P.O.-V.)

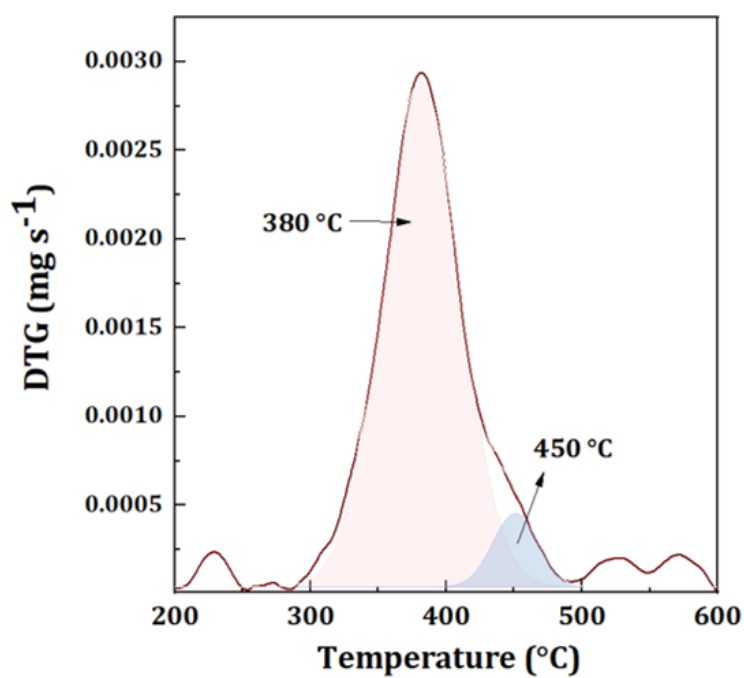

Figure S1. Derivative of the mass loss curve corresponding to the decomposition of waste tire samples

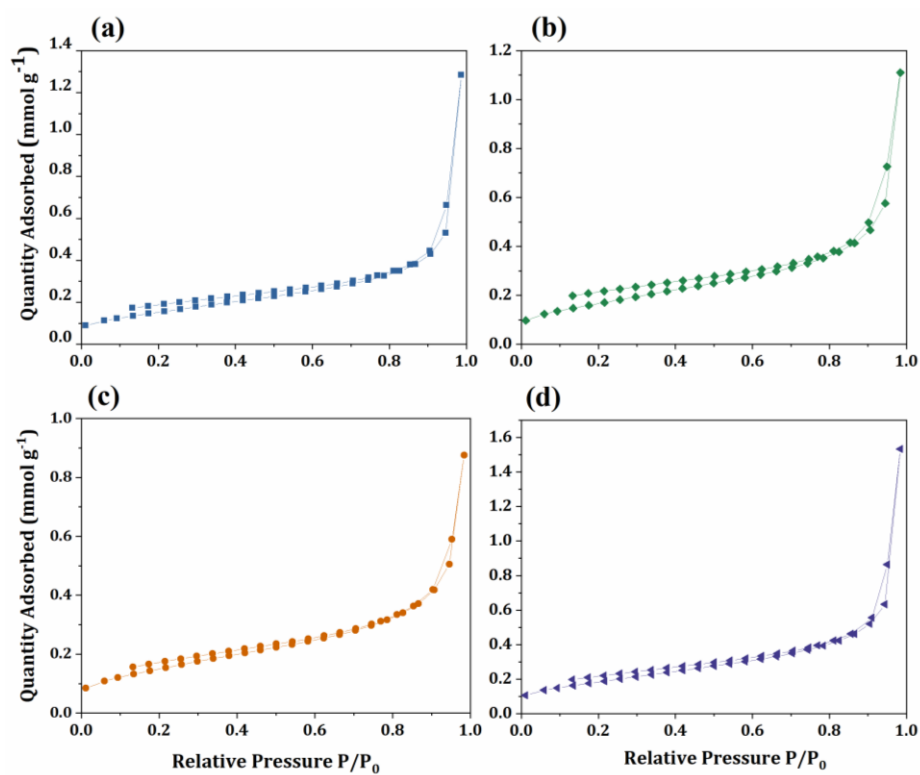

Figure S2. N<sub>2</sub> adsorption-desorption isotherms of NiTiO<sub>3</sub> (a) oxidized, (b) reduced and CoTiO<sub>3</sub> (c) oxidized, (d) reduced

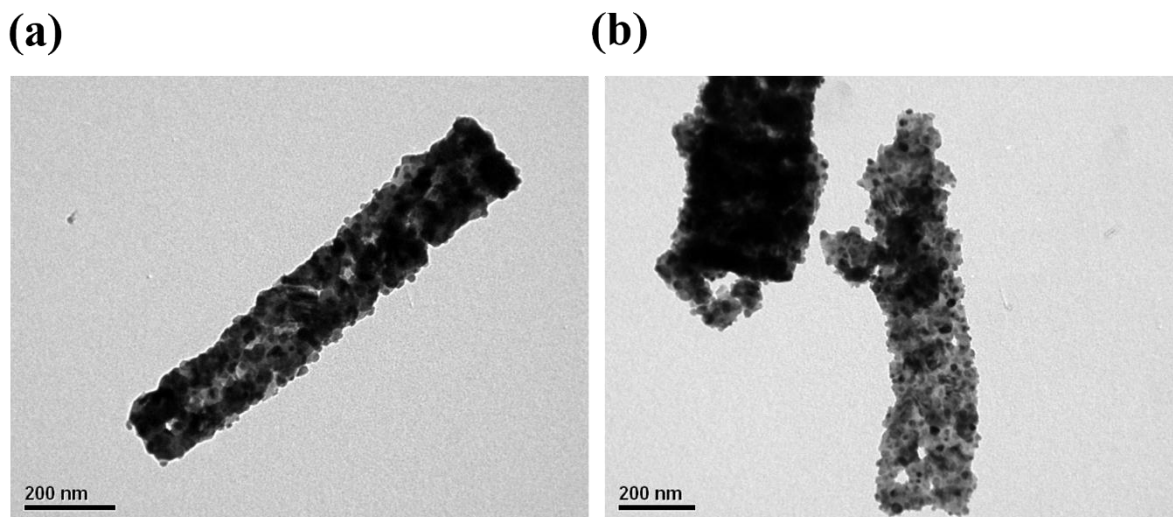

**Figure S3.** TEM micrographs showing metallic particles of reduced (a) CoTiO<sub>3</sub>, (b) NiTiO<sub>3</sub> catalysts

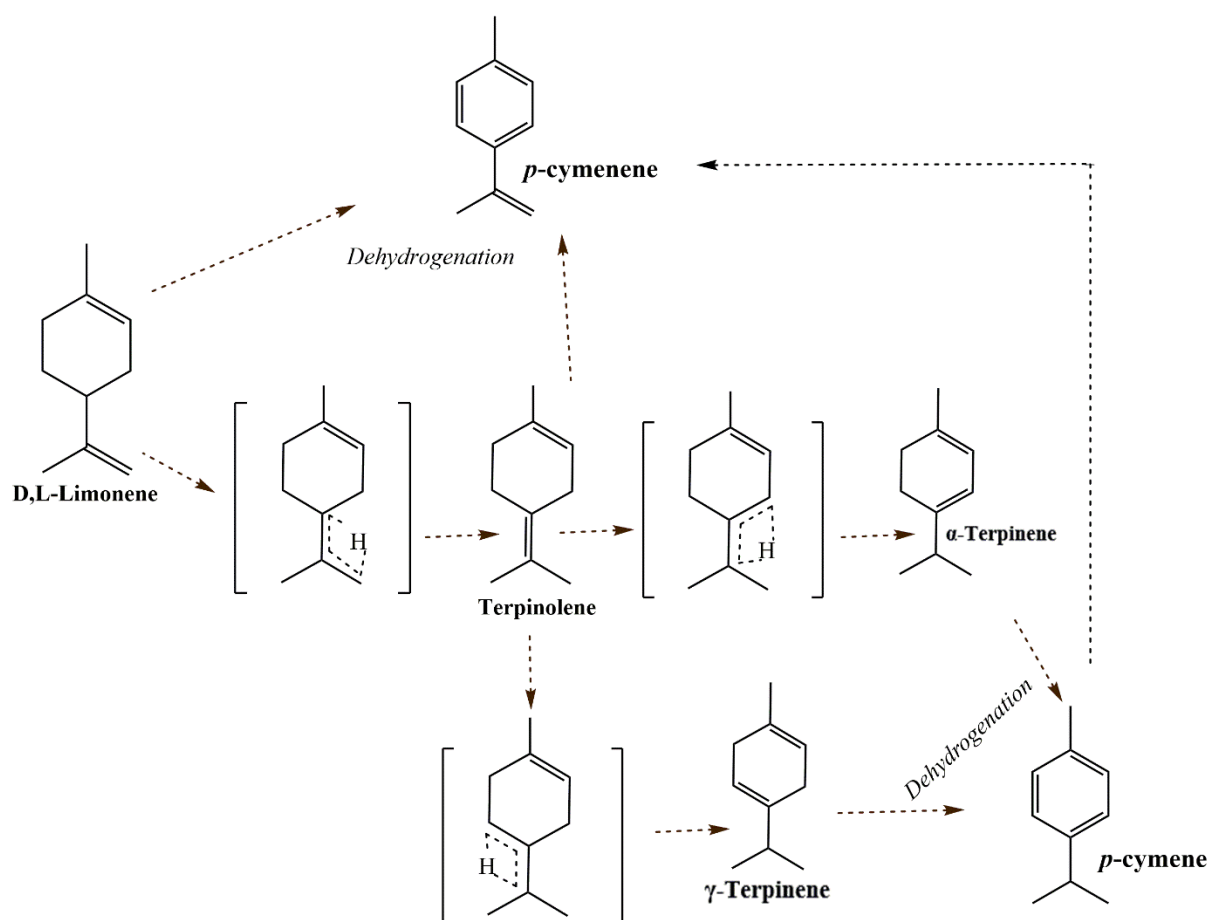

**Figure S4.** The proposed mechanism for p-cymene and p-cymenene formation from limonene comes from waste tire pyrolysis.

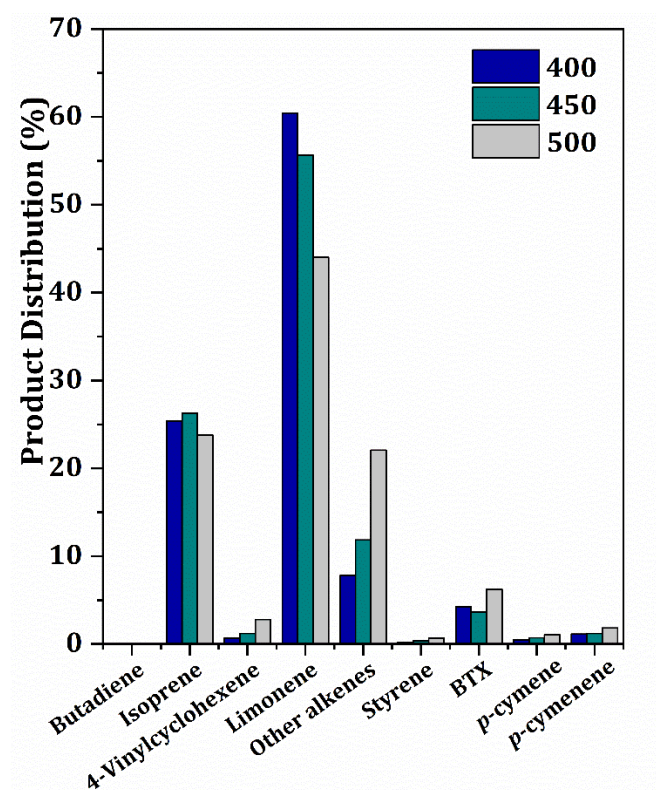

**Figure S5.** Temperature effect on product distribution during waste tire pyrolysis

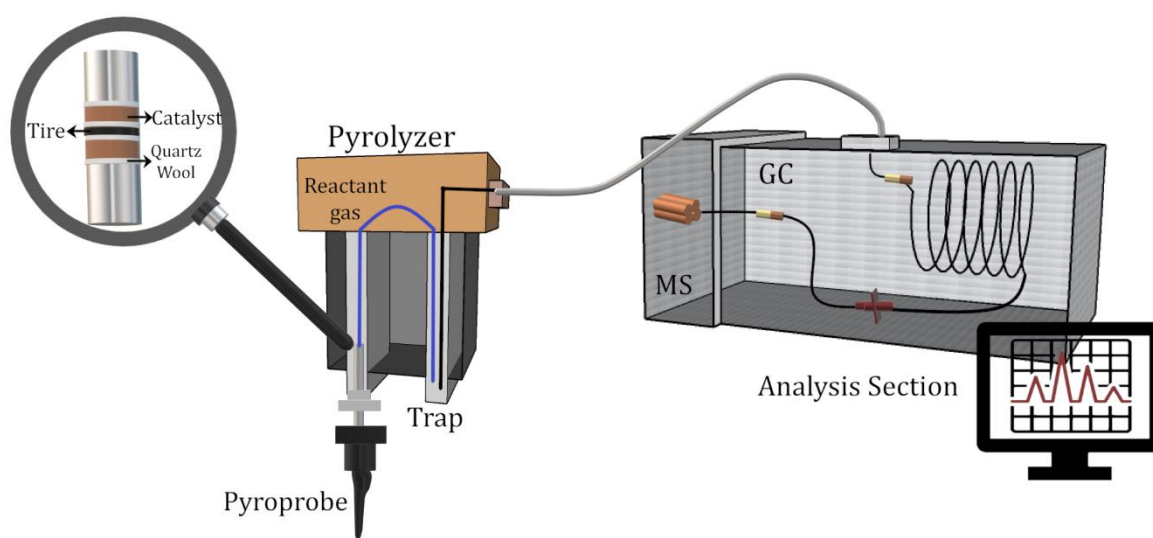

**Figure S6.** Analytical micropyrolysis reactor
